# Supplementary material for: Influence of water exchange rates on toxicity and bioaccumulation of hydrophobic organic chemicals in sediment toxicity tests
Source: Royal Society of Chemistry journal article supplement (doi:10.1039/d2em00462c), 2023-01-01
Supplement: d2em00462c1.xlsx [file d2em00462c1.xlsx]

## Sheet: Cdiss,over
Total dissolved Phe concentrations in overlying water
			Day
	Scenario	Chemical	Beaker	0	1	1.01	1.01069	1.01347	1.01694	1.03083	1.26	2	2.01	2.135	2.26	3	3.01	3.30167	3.3225	4	4.01	6	6.01	6.30167	6.3225	7	7.01	7.15583	7.30167	8	8.01	8.26	9.3	10		Ave.
	1	Phe	1	3.68	14.8	NA	NA	NA	NA	NA	NA	13.376	NA	NA	NA	13.632	NA	NA	NA	NA	NA	NA	NA	NA	NA	12.608	NA	NA	NA	NA	NA	NA	NA	14.56		12.1093
	1	Phe	2	3.176	17.432	NA	NA	NA	NA	NA	NA	16.24	NA	NA	NA	17.032	NA	NA	NA	NA	NA	NA	NA	NA	NA	16.952	NA	NA	NA	NA	NA	NA	NA	9.936		13.4613
	1	Phe	3	2.688	18.672	NA	NA	NA	NA	NA	NA	19.36	NA	NA	NA	18.088	NA	NA	NA	NA	NA	NA	NA	NA	NA	16.384	NA	NA	NA	NA	NA	NA	NA	12.2		14.5653
	2	Phe	1	2.384	8.376	8.704	3.432	3.728	3.848	3.808	6.008	8.176	NA	NA	NA	10.36	4.616	6.808	3.784	NA	NA	9.056	4.952	6.744	3.36	7.664	NA	NA	NA	7.472	4.104	5.312	7.272	8.12		6.00383
	2	Phe	2	2.44	6.168	5.488	3.176	2.808	2.632	2.616	4.64	7.888	NA	NA	NA	10.024	3.992	6.272	3.024	NA	NA	9.08	4.136	5.856	3.136	6.264	NA	NA	NA	8.296	4.216	6.968	7.024	9.2		5.44974
	2	Phe	3	2.984	4.4	3.784	3.408	3.368	3.12	3.368	4.864	6.752	NA	NA	NA	7.592	3.552	6.272	2.448	NA	NA	8.736	3.432	4.848	2.576	5.216	NA	NA	NA	7.824	3.192	6.272	7.624	8.152		4.94713
	3	Phe	1	4.976	11.376	10.672	4.776	4.84	4.76	5.16	8.784	12.168	4.624	7.08	7.984	10.328	4.208	7.912	3.704	8.368	4.616	7.984	4.248	7.336	3.608	8.28	4.072	6.672	6.96	7.632	3.592	6.824	6.776	8.192		6.72619
	3	Phe	2	4.144	7.088	6.016	4.12	2.784	2.76	2.92	4.736	7.112	3.048	4.896	5.952	6.592	3.312	7.152	3.432	10.384	5.192	9.6	4.56	7.744	3.264	9.72	4.208	5.696	6.712	8.816	3.52	5.904	7.4	9.016		5.73548
	3	Phe	3	2.912	5.648	5.512	3.608	2.872	3.272	3.328	4.744	7.344	3.648	5.104	5.856	7.04	3.536	7.688	4.304	10.144	5.36	10.12	5.48	8.16	4.128	10.176	4.832	6.12	7.288	9.064	4.488	6.304	7.592	9.904		5.98632
	4	Phe	1	2.04	6.456	NA	NA	NA	NA	NA	NA	7.144	NA	NA	NA	6.008	NA	NA	NA	6.736	NA	NA	NA	NA	NA	5	NA	NA	NA	6.72	NA	NA	NA	4.632		5.592
	4	Phe	2	1.744	4.576	NA	NA	NA	NA	NA	NA	4.264	NA	NA	NA	6.096	NA	NA	NA	5.448	NA	NA	NA	NA	NA	4.904	NA	NA	NA	6.312	NA	NA	NA	5.24		4.823
	4	Phe	3	1.792	2.392	NA	NA	NA	NA	NA	NA	2.64	NA	NA	NA	3.544	NA	NA	NA	5.056	NA	NA	NA	NA	NA	4.232	NA	NA	NA	4.88	NA	NA	NA	6.376		3.864
	5	Phe	1	3.416	6.944	7.792	NA	NA	NA	7.528	6.08	5.232	NA	4.608	NA	5.216	NA	NA	NA	3.992	NA	NA	NA	NA	NA	2.216	NA	NA	NA	3.576	NA	NA	NA	1.952		4.87933
	5	Phe	2	3.64	2.744	3.336	NA	NA	NA	3.168	2.592	2.52	NA	4.016	NA	3.456	NA	NA	NA	5.832	NA	NA	NA	NA	NA	2.048	NA	NA	NA	3.672	NA	NA	NA	2.272		3.27467
	5	Phe	3	1.72	2.296	2.336	NA	NA	NA	2.296	2.68	1.888	NA	2.136	NA	2.768	NA	NA	NA	3.712	NA	NA	NA	NA	NA	1.968	NA	NA	NA	2.944	NA	NA	NA	2.096		2.40333
	Unit: μg/L
	Note: Water replacement in Scenarios 2 and 3 were done at just 9:00 AM and 16:30 every day (i.e, Day X.0000 and X.3125), except at 9:15 AM on Day 1 (Day 1.010).
Total dissolved Pyr concentrations in overlying water
				Day
	Scenario	Chemical	Beaker	0	1	1.01	1.01069	1.01347	1.01694	1.03083	1.26	2	2.01	2.135	2.26	3	3.01	3.30167	3.3225	4	4.01	6	6.01	6.30167	6.3225	7	7.01	7.15583	7.30167	8	8.01	8.26	9.3	10		Ave.
	1	Pyr	1	1.232	3.568	NA	NA	NA	NA	NA	NA	4.088	NA	NA	NA	5.048	NA	NA	NA	NA	NA	NA	NA	NA	NA	7.464	NA	NA	NA	NA	NA	NA	NA	8.4		4.96667
	1	Pyr	2	0.856	4.664	NA	NA	NA	NA	NA	NA	6.056	NA	NA	NA	8.504	NA	NA	NA	NA	NA	NA	NA	NA	NA	12.848	NA	NA	NA	NA	NA	NA	NA	12.232		7.52667
	1	Pyr	3	0.736	4.856	NA	NA	NA	NA	NA	NA	6.672	NA	NA	NA	8.528	NA	NA	NA	NA	NA	NA	NA	NA	NA	11.28	NA	NA	NA	NA	NA	NA	NA	11.088		7.19333
	2	Pyr	1	0.856	2.32	2.384	1.008	1.048	0.936	0.952	1.408	2.128	NA	NA	NA	3.024	1.08	1.704	0.896	NA	NA	3.336	1.92	1.832	1.04	2.272	NA	NA	NA	2.176	1.376	1.368	2.128	2.776		1.73774
	2	Pyr	2	0.688	1.336	1.272	0.728	0.632	0.568	0.576	0.96	1.848	NA	NA	NA	2.512	0.776	1.416	0.576	NA	NA	2.664	1.36	1.28	0.792	1.6	NA	NA	NA	2.288	1.376	1.584	2.12	2.616		1.37252
	2	Pyr	3	0.888	1.288	1.224	0.848	0.84	0.768	0.824	1.208	1.72	NA	NA	NA	1.92	0.72	1.448	0.36	NA	NA	2.464	1.072	1.072	0.632	1.304	NA	NA	NA	2.128	1.088	1.368	2.36	2.424		1.30296
	3	Pyr	1	1.44	2.752	2.536	1.16	1.2	1.184	1.296	2.064	3.12	1.2	1.768	1.52	2.688	0.984	2.104	0.824	2.416	1.608	2.896	1.936	2.248	1.136	3.04	1.384	2.152	2.288	2.432	1.344	1.8	1.84	2.6		1.90194
	3	Pyr	2	1.136	1.752	1.584	1.408	0.768	0.736	0.752	1.216	1.76	0.8	1.192	1.096	1.36	0.704	1.68	0.712	2.704	1.752	3.192	2.008	2.248	1.08	3.136	1.472	1.896	2.248	2.784	1.368	1.56	1.872	2.856		1.63974
	3	Pyr	3	0.944	1.384	1.4	1.128	0.728	0.784	0.8	1.136	1.712	0.928	1.24	1.112	1.456	0.736	1.88	1.08	2.728	1.952	3.448	2.392	2.472	1.44	3.464	1.728	2.208	2.56	3.088	1.784	1.872	1.96	3.208		1.76619
	4	Pyr	1	0.712	1.664	NA	NA	NA	NA	NA	NA	2.072	NA	NA	NA	1.688	NA	NA	NA	1.864	NA	NA	NA	NA	NA	1.424	NA	NA	NA	2.016	NA	NA	NA	1.496		1.617
	4	Pyr	2	0.56	0.928	NA	NA	NA	NA	NA	NA	1.032	NA	NA	NA	1.2	NA	NA	NA	1.456	NA	NA	NA	NA	NA	1.32	NA	NA	NA	1.872	NA	NA	NA	1.56		1.241
	4	Pyr	3	0.792	0.872	NA	NA	NA	NA	NA	NA	0.872	NA	NA	NA	0.544	NA	NA	NA	1.192	NA	NA	NA	NA	NA	1.08	NA	NA	NA	1.344	NA	NA	NA	1.928		1.078
	5	Pyr	1	1.128	1.904	2.104	NA	NA	NA	2.112	1.76	1.64	NA	1.352	NA	1.408	NA	NA	NA	1.264	NA	NA	NA	NA	NA	0.728	NA	NA	NA	1.144	NA	NA	NA	0.632		1.43133
	5	Pyr	2	0.984	0.688	0.896	NA	NA	NA	0.824	0.752	0.632	NA	1.008	NA	0.52	NA	NA	NA	1.576	NA	NA	NA	NA	NA	0.52	NA	NA	NA	1.072	NA	NA	NA	0.632		0.842
	5	Pyr	3	0.56	0.592	0.64	NA	NA	NA	0.608	0.632	0.432	NA	0.52	NA	0.2	NA	NA	NA	0.888	NA	NA	NA	NA	NA	0.48	NA	NA	NA	0.8	NA	NA	NA	0.56		0.576
	Unit: μg/L
	Note: Water replacement in Scenarios 2 and 3 were done at just after 9:00 AM and 16:30 every day (i.e, Day XX.0000 and XX.3125), except at 9:15 AM on Day 1 (i.e., Day 1.010).
Total dissolved BaP concentrations in overlying water
				Day
	Scenario	Chemical	Beaker	0	1	1.01	1.01069	1.01347	1.01694	1.03083	1.26	2	2.01	2.135	2.26	3	3.01	3.30167	3.3225	4	4.01	6	6.01	6.30167	6.3225	7	7.01	7.15583	7.30167	8	8.01	8.26	9.3	10		Ave.
	1	BaP	1	0.135	0.064	NA	NA	NA	NA	NA	NA	0.28	NA	NA	NA	0.504	NA	NA	NA	NA	NA	NA	NA	NA	NA	2.548	NA	NA	NA	NA	NA	NA	NA	2.28		0.9685
	1	BaP	2	0.14	0.188	NA	NA	NA	NA	NA	NA	0.908	NA	NA	NA	2.08	NA	NA	NA	NA	NA	NA	NA	NA	NA	7.256	NA	NA	NA	NA	NA	NA	NA	6.488		2.84333
	1	BaP	3	0.14	0.188	NA	NA	NA	NA	NA	NA	1.356	NA	NA	NA	2.28	NA	NA	NA	NA	NA	NA	NA	NA	NA	5.732	NA	NA	NA	NA	NA	NA	NA	5.784		2.58
	2	BaP	1	0.125	<LOQ	<LOQ	<LOQ	<LOQ	<LOQ	<LOQ	<LOQ	<LOQ	NA	NA	NA	<LOQ	<LOQ	<LOQ	0.172	NA	NA	0.516	0.464	0.24	0.288	<LOQ	NA	NA	NA	0.128	0.136	0.18	0.136	2.64		0.456818
	2	BaP	2	0.145	<LOQ	<LOQ	<LOQ	<LOQ	<LOQ	<LOQ	<LOQ	<LOQ	NA	NA	NA	<LOQ	<LOQ	<LOQ	0.156	NA	NA	0.444	0.348	0.132	<LOQ	<LOQ	NA	NA	NA	0.092	0.168	0.296	0.096	<LOQ		0.208556
	2	BaP	1	<LOQ	<LOQ	<LOQ	<LOQ	<LOQ	<LOQ	<LOQ	<LOQ	<LOQ	NA	NA	NA	<LOQ	<LOQ	<LOQ	0.128	NA	NA	0.16	0.272	0.1	<LOQ	<LOQ	NA	NA	NA	0.104	0.316	0.2	0.12	<LOQ		0.175
	3	BaP	2	0.125	<LOQ	<LOQ	<LOQ	<LOQ	<LOQ	<LOQ	<LOQ	0.152	<LOQ	0.16	0.08	<LOQ	0.096	0.112	<LOQ	0.344	0.412	0.676	0.66	0.484	0.336	0.684	0.236	0.504	0.396	0.324	0.348	0.292	0.12	0.22		0.321952
	3	BaP	3	0.155	<LOQ	<LOQ	0.156	<LOQ	<LOQ	<LOQ	<LOQ	<LOQ	0.124	<LOQ	0.1	<LOQ	0.064	0.064	0.18	0.224	0.448	0.568	1.24	0.644	0.328	0.6	0.276	0.276	0.296	0.484	0.42	0.236	0.1	0.224		0.327591
	3	BaP	1	0.17	<LOQ	<LOQ	0.096	<LOQ	<LOQ	<LOQ	<LOQ	<LOQ	0.184	<LOQ	0.124	<LOQ	0.112	0.192	0.376	0.304	0.956	0.612	1.184	0.804	0.636	0.612	0.316	0.468	0.332	0.66	0.608	0.552	0.124	0.232		0.438818
	4	BaP	2	0.135	<LOQ	NA	NA	NA	NA	NA	NA	<LOQ	NA	NA	NA	<LOQ	NA	NA	NA	0.444	NA	NA	NA	NA	NA	<LOQ	NA	NA	NA	0.408	NA	NA	NA	<LOQ		0.329
	4	BaP	1	0.125	<LOQ	NA	NA	NA	NA	NA	NA	<LOQ	NA	NA	NA	<LOQ	NA	NA	NA	0.556	NA	NA	NA	NA	NA	<LOQ	NA	NA	NA	0.596	NA	NA	NA	0.108		0.34625
	4	BaP	2	0.145	<LOQ	NA	NA	NA	NA	NA	NA	<LOQ	NA	NA	NA	<LOQ	NA	NA	NA	0.152	NA	NA	NA	NA	NA	<LOQ	NA	NA	NA	<LOQ	NA	NA	NA	0.188		0.161667
	5	BaP	3	0.145	<LOQ	<LOQ	NA	NA	NA	<LOQ	<LOQ	<LOQ	NA	<LOQ	NA	<LOQ	NA	NA	NA	0.136	NA	NA	NA	NA	NA		NA	NA	NA	0.132	NA	NA	NA	<LOQ		0.137667
	5	BaP	3	0.125	<LOQ	<LOQ	NA	NA	NA	<LOQ	<LOQ	<LOQ	NA	0.104	NA	<LOQ	NA	NA	NA	0.592	NA	NA	NA	NA	NA	<LOQ	NA	NA	NA	0.156	NA	NA	NA	<LOQ		0.24425
	5	BaP	3	<LOQ	<LOQ	<LOQ	NA	NA	NA	<LOQ	<LOQ	<LOQ	NA	<LOQ	NA	<LOQ	NA	NA	NA	<LOQ	NA	NA	NA	NA	NA	<LOQ	NA	NA	NA	<LOQ	NA	NA	NA	<LOQ		#DIV/0!
	Unit: μg/L
	Instrumental LOD: 0.015 μg/L, LOQ: 0.045 μg/L
	Note: Water replacement in Scenarios 2 and 3 were done at just after 9:00 AM and 16:30 every day (i.e, Day XX.0000 and XX.3125), except at 9:15 AM on Day 1 (i.e., Day 1.010).

## Sheet: C_diss,pore
Total dissolved PAH concentrations in pore water
				Day							Day							Day
	Scenario	Chemical	Beaker	0	10	Ave		Scenario	Chemical	Beaker		10	Ave		Scenario	Chemical	Beaker	0	10	Ave
	NA	Phe	0	46.66	NA			NA	Pyr	0	13.22	NA			NA	BaP	0	7.34	NA
	NA	Phe	0	38.12	NA			NA	Pyr	0	11.42	NA			NA	BaP	0	5.98	NA
	NA	Phe	0	39.9	NA			NA	Pyr	0	16.72	NA			NA	BaP	0	12.32	NA
	NA	Phe	0	44.32	NA			NA	Pyr	0	16.18	NA			NA	BaP	0	10.58	NA
	1	Phe	4	NA	44.3	46.3		1	Pyr	4	NA	17.62	18.62		1	BaP	4	NA	14.42	14.69
	1	Phe	5	NA	48.3			1	Pyr	5	NA	19.62			1	BaP	5	NA	14.96
	2	Phe	4	NA	39.82	46.2		2	Pyr	4	NA	20.22	24.84		2	BaP	4	NA	22.5	29.38
	2	Phe	5	NA	52.58			2	Pyr	5	NA	29.46			2	BaP	5	NA	36.26
	3	Phe	4	NA	31.86	37.71		3	Pyr	4	NA	11.34	20.71		3	BaP	4	NA	6.72	20.29
	3	Phe	5	NA	43.56			3	Pyr	5	NA	30.08			3	BaP	5	NA	33.86
	4	Phe	4	NA	48.04	44.41		4	Pyr	4	NA	24.02	19.13		4	BaP	4	NA	22.26	15.68
	4	Phe	5	NA	40.78			4	Pyr	5	NA	14.24			4	BaP	5	NA	9.1
	5	Phe	4	NA	42	42.09		5	Pyr	4	NA	17.54	15.94		5	BaP	4	NA	13.64	11.43
	5	Phe	5	NA	42.18			5	Pyr	5	NA	14.34			5	BaP	5	NA	9.22
	Unit: μg/L
	Note: From Day -1 to Day 0, all beakers were subjected to 4 volumes of water replacement, regardless of Scenarios.
log KDOC for each PAH
	Scenario	Phe	Pyr	BaP
	1	#NUM!	3.98598	5.54124
	2	2.67209	4.09876	5.79763
	3	3.22503	4.26083	5.76714
	4	#NUM!	4.05387	5.64528
	5	#NUM!	3.9964	5.58901
	mean	2.94856	4.07917	5.66806
		888.299	11999.6	465650
	Unit: L/kg-oc

## Sheet: Cfree,over
Freely dissolved PAH concentrations in overlying water
	Scenario	Chemical	Beaker	Cfree			Scenario	Chemical	Beaker	Cfree			Scenario	Chemical	Beaker	Cfree
	1	Phe	1	14.1772			1	Pyr	1	4.19475			1	BaP	1	0.114835
	1	Phe	2	9.82294			1	Pyr	2	4.49801			1	BaP	2	0.146718
	1	Phe	3	9.0454			1	Pyr	3	3.21063			1	BaP	3	0.106089
	1	Phe	4	10.229			1	Pyr	4	3.59606			1	BaP	4	0.108628
	1	Phe	5	14.2463			1	Pyr	5	4.26518			1	BaP	5	0.123864
	2	Phe	1	7.08427			2	Pyr	1	1.61999			2	BaP	1	0.0713841
	2	Phe	2	11.5595			2	Pyr	2	2.39868			2	BaP	2	0.0773093
	2	Phe	3	12.1435			2	Pyr	3	2.8565			2	BaP	3	0.0902882
	2	Phe	4	12.4579			2	Pyr	4	2.93476			2	BaP	4	0.110039
	2	Phe	5	8.01732			2	Pyr	5	1.87629			2	BaP	5	0.0671519
	3	Phe	1	14.2377			3	Pyr	1	2.69998			3	BaP	1	0.104396
	3	Phe	2	13.4342			3	Pyr	2	2.77041			3	BaP	2	0.0998814
	3	Phe	4	10.9893			3	Pyr	4	2.38889			3	BaP	4	0.105242
	3	Phe	5	11.6718			3	Pyr	5	2.53563			3	BaP	5	0.0942384
	4	Phe	1	11.5911			4	Pyr	1	2.39215			4	BaP	1	0.105995
	4	Phe	2	9.07996			4	Pyr	2	1.82346			4	BaP	2	0.0747699
	4	Phe	3	10.0303			4	Pyr	3	1.94868			4	BaP	3	0.0784379
	4	Phe	4	7.39529			4	Pyr	4	1.59064			4	BaP	4	0.0846452
	4	Phe	5	8.26786			4	Pyr	5	1.74912			4	BaP	5	0.0846452
	5	Phe	1	6.7387			5	Pyr	1	1.29912			5	BaP	1	0.0835166
	5	Phe	2	7.5076			5	Pyr	2	1.35977			5	BaP	2	0.0699734
	5	Phe	3	11.5453			5	Pyr	3	1.99706			5	BaP	3	0.0865433
	5	Phe	4	6.03891			5	Pyr	4	1.27369			5	BaP	4	0.0821059
	5	Phe	5	6.81645			5	Pyr	5	1.28542			5	BaP	5	0.0812594
	Unit: μg/L
	Note: Freely dissolved concentrations were measured only at Day 10.

## Sheet: Cfree,pore
Freely dissolved PAH concentrations in overlying water
	Scenario	Chemical	Beaker	Cfree,pore			Scenario	Chemical	Beaker	Cfree,pore			Scenario	Chemical	Beaker	Cfree,pore
	1	Phe	1	56.0729			1	Pyr	1	8.50219			1	BaP	1	0.274138
	1	Phe	2	48.613			1	Pyr	2	10.061			1	BaP	2	0.380122
	1	Phe	2	33.0801			1	Pyr	2	7.03951			1	BaP	2	0.396986
	1	Phe	3	49.1817			1	Pyr	3	7.80646			1	BaP	3	0.222194
	1	Phe	3	41.2577			1	Pyr	3	7.95863			1	BaP	3	0.290772
	2	Phe	1	37.1723			2	Pyr	1	5.67909			2	BaP	1	0.290991
	2	Phe	1	38.4019			2	Pyr	1	6.22462			2	BaP	1	0.194049
	2	Phe	2	43.0585			2	Pyr	2	7.09772			2	BaP	2	0.22565
	2	Phe	2	39.6114			2	Pyr	2	7.14223			2	BaP	2	0.236019
	2	Phe	3	50.119			2	Pyr	3	7.95026			2	BaP	3	0.27157
	2	Phe	3	41.1384			2	Pyr	3	7.59075			2	BaP	3	0.250338
	3	Phe	1	40.7722			3	Pyr	1	6.3132			3	BaP	1	0.212159
	3	Phe	1	32.4552			3	Pyr	1	5.9956			3	BaP	1	0.309425
	3	Phe	2	23.8206			3	Pyr	2	4.75692			3	BaP	2	0.166782
	3	Phe	2	34.1082			3	Pyr	2	6.35473			3	BaP	2	0.275191
	3	Phe	3	43.0384			3	Pyr	3	6.66516			3	BaP	3	0.227131
	3	Phe	3	37.2458			3	Pyr	3	6.65039			3	BaP	3	0.196925
	4	Phe	1	45.8102			4	Pyr	1	7.07375			4	BaP	1	0.227131
	4	Phe	1	41.9397			4	Pyr	1	6.87174			4	BaP	1	0.226144
	4	Phe	2	61.4715			4	Pyr	2	10.1992			4	BaP	2	0.378746
	4	Phe	2	45.983			4	Pyr	2	8.1195			4	BaP	2	0.285678
	4	Phe	3	45.9765			4	Pyr	3	7.40244			4	BaP	3	0.250832
	4	Phe	3	40.5337			4	Pyr	3	6.69027			4	BaP	3	0.216762
	5	Phe	1	44.7367			5	Pyr	1	6.86147			5	BaP	1	0.21775
	5	Phe	1	41.3461			5	Pyr	1	7.12889			5	BaP	1	0.277547
	5	Phe	2	57.5273			5	Pyr	2	10.6072			5	BaP	2	0.319959
	5	Phe	2	34.0779			5	Pyr	2	7.12853			5	BaP	2	0.236019
	5	Phe	3	45.2357			5	Pyr	3	7.21755			5	BaP	3	0.288358
	Unit: μg/L
	Note: Freely dissolved concentrations were measured only at Day 10.

## Sheet: DOC
DOC in overlying water											DOC in pore water
			Day											Day
	Scenario	Beaker	0	1	2	7	10		Mean Day10			Scenario	Beaker	0	10		mean	SD
	1	1	3.234	NA	NA	NA	47.96		50.2133			NA	0	74	NA		95.725	18.2924
	1	2	3.404	NA	NA	NA	51.46					NA	0	88.58	NA
	1	3	3.324	NA	NA	NA	51.22					NA	0	115.82	NA
	2	1	3.036	7.592	5.67	5.792	6.474		6.06133			NA	0	104.5	NA
	2	2	2.926	7.454	5.556	5.148	5.954					1	4	NA	99.48		101.44	2.77186
	2	3	3.498	6.364	4.778	5.002	5.756					1	5	NA	103.4
	3	1	3.588	6.022	5.256	4.62	3.39		3.618			2	4	NA	102.6		112.95	14.6371
	3	2	3.958	5.272	4.558	4.704	3.578					2	5	NA	123.3
	3	3	2.838	5.196	4.542	4.82	3.886					3	4	NA	75.79		87.26	16.221
	4	1	3.552	6.168	5.52	4.712	3.674		4.12867			3	5	NA	98.73
	4	2	3.496	6.524	5.29	4.658	3.56					4	4	NA	99.86		91.195	12.2542
	4	3	2.804	4.908	4.552	5.172	5.152					4	5	NA	82.53
	5	1	4	5.68	4.03	3.48	2.562		2.56867			5	4	NA	84.62		84.865	0.346482
	5	2	4.376	5.024	3.884	3.546	2.564					5	5	NA	85.11
	5	3	3.148	3.546	4.21	3.85	2.58
	Unit: mgC/L											Unit: mgC/L
	Note: Water samples were taken just before water replacement (in Scenarios 4 &5).											Note: From Day -1 to Day 0, all beakers were subjected to 4 volumes of water replacement, regardless of Scenarios.

## Sheet: Accumulation
PAH concentration in amphipods
			Scenario
	Chemical	Beaker	1	2	3	4	5
	Phe	1	7.69565	12.8889	9.96552	14.8788	15.9245
	Phe	2	6.97333	13.9583	7.64063	26.7297	6.13333
	Phe	3	8.51648	14.4138	19.0588	6.75342	19.9123
	Pyr	1	55.7391	48.4028	43.0517	46.8333	50.9057
	Pyr	2	75.88	54.8542	36.2813	93.0541	22.8333
	Pyr	3	66.9451	45.931	68.6176	26.4932	53.9474
	BaP	1	6.45652	6.44444	6	6.36364	7.9434
	BaP	2	11.56	7.91667	5.8125	11.3243	6.1
	BaP	3	7.95604	12.4138	10.6618	7.26027	5.92982
	unit: mg/kg-dry
	Average
	Phe		7.72849	13.7537	12.2217	16.1206	13.99
	Pyr		66.1881	49.7293	49.3169	55.4602	42.5621
	BaP		8.65752	8.92497	7.49142	8.31608	6.65774
	SD
	Phe		0.772099	0.782782	6.03419	10.0459	7.09024
	Pyr		10.0918	4.6071	17.0543	34.1087	17.1532
	BaP		2.62306	3.10979	2.7472	2.64351	1.11666

## Sheet: Sediment
Mean PAH concentration in sediment									foc of sediment								log KOC for each PAH
		Day10									Day10
		Scenario									Scenario							Scenario
	Day-1	1	2	3	4	5				Day-1	1	2	3	4	5			1	2	3	4	5	mean	SD
Phe	17.2417	10.5	8.05	9.325	10.2167	8.39167			Mean	2.119	2.25549	1.22465	1.32378	1.36486	1.91483		Phe	4.14655	4.24766	4.33323	4.22105	4.14736	4.21917	0.0778706
Pyr	19.5	13.1083	10.8333	11.6417	12.8333	10.7167			SD	0.125857	0.14999	0.109568	0.172809	0.157683	0.179834		Pyr	4.95778	5.11359	5.16722	5.08064	4.97774	5.05939	0.0894538
BaP	25.3133	17.6733	15.0933	15.04	16.08	14.4533											BaP	6.49991	6.69529	6.70234	6.65226	6.56086	6.62213	0.0885836
									Unit: %
Standard deviations of PAH concentration in sediment																	Unit: L/kg-oc
		Scenario
	Day-1	1	2	3	4	5
Phe	1.09554	2.68514	0.0866025	1.88862	0.707696	1.37485
Pyr	4.49778	2.82843	0.282843	0.141421	0.636396	0.424264
BaP	2.10678	2.89914	0.141421	0.282843	0.282843	0.848528
Unit: mg/kg-dry
Mean PAH concentration in sediment
		Day10
		Scenario
	Day-1	1	2	3	4	5
Phe	813.67	465.53	657.332	704.421	748.549	438.247
Pyr	920.246	581.173	884.609	879.424	940.265	559.668
BaP	1194.59	783.568	1232.46	1136.14	1178.14	754.812
Unit: mg/kg-oc

## Sheet: Ammonia
Total ammonia concentrations in overlying water						Total ammonia concentrations in pore water
		Day							Day
	Scenario	0	10				Scenario	Beaker	0	10
	1	0.4	5.16				1	4	NA	6.6
	2	0.28	1.01				2	4	NA	3.4
	3	0.38	0.45				2	5	NA	4.8
	4	0.21	0.41				3	5	NA	2.8
	5	0.32	0.16				4	4	NA	2.4
							5	4	NA	2.6
	unit: mgN/L						5	5	NA	3
	Note: Only one replocate per each Scenario.

## Sheet: pH
pH in overlying water										pH in pore water
			Day										Day
	Scenario	Beaker	0	2	4	6	8	10			Scenario	Beaker	0	10
	1	1	7.96	7.58	7.51	7.37	7.46	7.29			1	4	NA	7.9
	2	1	8.03	7.56	7.47	7.63	7.75	7.55			1	5	NA	7.8
	3	1	7.95	7.89	7.87	7.88	7.89	7.65			2	4	NA	7.6
	4	1	8.07	7.7	7.75	7.8	7.78	7.73			3	5	NA	8.1
	5	1	8.02	7.82	7.84	7.95	7.87	7.93			4	4	NA	8.5
											4	5	NA	8.4
	Unit: -										5	4	NA	8
											5	5	NA	8.3
										Note: measured by LAQUAtwin pH meter.
